# Supplementary material for: Systematic review of clinical practice guidelines for uveitis
Source: HighWire-hosted journal article supplement (doi:10.1136/bmjophth-2022-001091), 2023-01-01
Supplement: bmjophth-2022-001091supp001_data_supplement.pdf [file bmjophth-2022-001091supp001_data_supplement.pdf]

## Appendices

### Appendix 1

#### **Guideline databases**

1. Guidelines International Network
2. National Institute for Clinical Excellence ([UK](#))
3. eGuidelines
4. Guideline Central
5. ECRI Guidelines Trust Database
6. Australian National Health and Medical Research Council clinical practice guidelines
7. Canadian Medical Association Infobase of Clinical Practice Guidelines
8. Trip Database
9. WHO guidelines
10. US Preventive Services Task Force Guideline
11. Scottish Intercollegiate Guidelines Network (SIGN)

#### **Professional association websites**

1. College of Optometrists (UK)
2. Pan American Association of Ophthalmology
3. Eastern Mediterranean Council of Optometry
4. European Society of Ophthalmology
5. World Council of Optometry
6. American Academy of Ophthalmology
7. American Optometric Association
8. Asia Pacific Council of Optometry
9. International Council of Ophthalmology
10. Royal Australian and New Zealand College of Ophthalmologists
11. Royal College of Ophthalmologists
12. European Society of Cataract and Refractive Surgeons
13. American Society of Cataract and Refractive Surgeons
14. European Vitreoretinal Society
15. African Ophthalmology Council
16. Asia Pacific Academy of Ophthalmology

## Appendix 2

### Search strategy for academic databases

#### MEDLINE

- 1 exp eye diseases/ (557476)
- 2 visually impaired persons/ (2391)
- 3 or/1-2 (558065)
- 4 Practice Guidelines as Topic/ (115227)
- 5 Guidelines as Topic/ (39163)
- 6 Practice Guideline/ (26462)
- 7 ((clinical or practice) adj2 guideline\$.tw. (41838)
- 8 or/4-7 (202728)
- 9 3 and 8 (2180)
- 10 exp case reports/ (2078744)
- 11 case report\$.tw. (356889)
- 12 or/10-11 (2160660)
- 13 9 not 12 (2112)
- 14 limit 13 to english language (1676)
- 15 limit 14 to yr="2009 -Current" (949)
- 16 limit 15 to (address or autobiography or bibliography or biography or classical article or clinical trial, veterinary or clinical trials, veterinary as topic or comment or directory or editorial or "expression of concern" or festschrift or historical article or interactive tutorial or interview or letter or news or newspaper article or observational study, veterinary or personal narrative or portrait or video-audio media or webcast) (113)
- 17 15 not 16 (836)

#### Embase

- 1 exp eye disease/cn, di, dm, ep, et, pc, rh, su, th [Congenital Disorder, Diagnosis, Disease Management, Epidemiology, Etiology, Prevention, Rehabilitation, Surgery, Therapy] (314642)
- 2 visual impairment/cn, di, dm, ep, et, pc, rh, su, th [Congenital Disorder, Diagnosis, Disease Management, Epidemiology, Etiology, Prevention, Rehabilitation, Surgery, Therapy] (6819)
- 3 or/1-2 (314642)
- 4 practice guidelines/ (405820)
- 5 ((clinical or practice) adj2 guideline\$.tw. (60447)
- 6 or/4-5 (428306)
- 7 3 and 6 (3082)
- 8 exp case report/ (2347870)
- 9 case report\$.tw. (464572)
- 10 or/8-9 (2402846)
- 11 7 not 10 (2932)
- 12 limit 11 to english language (2574)
- 13 limit 12 to yr="2009 -Current" (1346)
- 14 limit 13 to (conference abstract or conference paper or editorial or letter or note or short survey or tombstone) (257)
- 15 13 not 14 (1089)

### Global Health

- 1 exp eye diseases/ (32535)
- 2 people with visual impairment/ (170)
- 3 or/1-2 (32658)
- 4 exp guideline/ (47207)
- 5 ((clinical or practice) adj2 guideline\$.tw. (4484)
- 6 or/4-5 (49229)
- 7 3 and 6 (333)
- 8 case reports/ (86862)
- 9 case report\$.tw. (94202)
- 10 8 or 9 (94202)
- 11 7 not 10 (329)
- 12 limit 11 to english language (279)
- 13 limit 12 to yr="2009 -Current" (197)

### CINAHL

- S5 S1 AND S4 Limiters - Published Date: 20090101-20200231; English Language;  
Exclude MEDLINE records
- S4 S2 OR S3
- S3 (TX clinical OR TX practice) N2 (guideline\*)
- S2 MM "Practice Guidelines"
- S1 MH "Eye Diseases+"

### WHO Global Index Medicus

#### SEARCH 1

(ab:(practice guideline)) AND (ab:(eye OR vision OR visual OR blindness ))

#### SEARCH 2

(mh:(eye diseases)) AND (mh:(practice guideline))

## Appendix 3

**AGREE II items used for appraisal of clinical practice guidelines**

| AGREE II Section | Statement                                                                                    |
|------------------|----------------------------------------------------------------------------------------------|
| 4                | The guideline development group includes individuals from all relevant professional groups.  |
| 7                | Systematic methods were used to search for evidence.                                         |
| 8                | The criteria for selecting the evidence are clearly described.                               |
| 10               | The methods for formulating the recommendations are clearly described.                       |
| 12               | There is an explicit link between the recommendations and the supporting evidence.           |
| 13               | The guideline has been externally reviewed by experts prior to its publication.              |
| 15               | The recommendations are specific and unambiguous.                                            |
| 22               | The views of the funding body have not influenced the content of the guideline.              |
| 23               | Competing interests of guideline development group members have been recorded and addressed. |
